# Supplementary material
Source: publisher figshare collection journal article supplement (https://gsapubs.figshare.com/ndownloader/files/24995090)
Supplement: Supplementary file 1 [file 24995090]

## Sheet: Noblesse data
Complete 40Ar/39Ar results using the Noblesse mass spectrometer
Single sanidine fusions
Sample:	74-O-02		J-value:	0.0104478	6.3e-06	(2σ)
	40Ar	± 2σ40	39Ar	±2σ39	37Ar	± 2σ37	36Ar	± 2σ36							Included in
File	(cps)	(cps)	(cps)	(cps)	(cps)	(cps)	(cps)	(cps)	40Ar*/39ArK	± 2σ	%40Ar*	Age (Ma)	± 2σ (Ma)	K/Ca	wtd. mean
NAD8419	284487	84.0044	53082	31.5517	375.159	178.987	2.64934	1.36601	5.34452	0.00847116	99.7223	99.4605	0.15344	60.8413	YES
NAD8422	491283	146.104	91590.6	52.5058	519.557	147.2	4.90661	1.14398	5.34784	0.00509153	99.7001	99.5204	0.0922211	75.8026	YES
NAD8425	624305	204.915	116490	53.4184	818.546	202.262	5.74819	1.23163	5.3446	0.00437252	99.7254	99.4618	0.0792005	61.1946	YES
NAD8428	291521	83.9353	54364.1	33.0061	367.889	183.923	3.21356	1.20464	5.34475	0.00753852	99.6708	99.4645	0.136547	63.5422	YES
NAD8431	518799	148.719	96640.3	51.3572	544.867	191.376	5.28352	1.32877	5.35195	0.00523317	99.6942	99.595	0.0947827	76.2666	YES
NAD8437	340222	96.2343	63585.2	35.1968	368.457	254.151	1.85698	0.903534	5.34187	0.00540103	99.8355	99.4123	0.0978327	74.2054	YES
NAD8440	420188	115.804	78200.4	44.2939	636.519	130.792	4.00099	1.38895	5.35808	0.00629246	99.7176	99.7059	0.113961	52.8279
NAD8443	240177	71.2309	44710.3	30.3034	319.301	241.236	0.450418	1.15921	5.3689	0.00871291	99.9445	99.9019	0.157781	60.2107
NAD8446	228341	63.4153	42621.7	25.7499	194.595	230.95	0.963093	1.14078	5.35048	0.00876062	99.8707	99.5684	0.158674	94.1816	YES
NAD8449	220010	64.2752	41082.8	28.3427	223.715	140.288	1.56641	1.20879	5.34382	0.00966161	99.7854	99.4477	0.175004	78.9643	YES
NAD8452	611743	176.699	113514	49.6565	354.244	164.831	12.0613	1.42737	5.35712	0.00469993	99.4059	99.6886	0.0851204	137.789
NAD8455	275483	77.9452	51260.4	34.4791	495.202	372.099	3.11288	1.20868	5.35633	0.00808084	99.6668	99.6742	0.146353	44.5108
NAD8458	391886	114.949	72660.2	39.9527	311.101	260.938	7.64646	1.17941	5.36181	0.00590526	99.4137	99.7735	0.106945	100.43
NAD8461	245644	66.5058	45859.5	31.1219	296.809	303.397	0.696225	1.60252	5.35191	0.0111563	99.9149	99.5942	0.202062	66.4383	YES
NAD8464	258914	77.0921	48221.9	29.4413	481.605	173.377	2.12501	1.15651	5.35635	0.00804125	99.7596	99.6746	0.145636	43.0545
NAD8467	275836	79.0448	51114.7	32.0259	321.375	210.794	5.80908	1.33398	5.36247	0.00864011	99.3704	99.7855	0.156473	68.3912
NAD8470	228150	67.4856	42499.1	28.9219	307.803	206.923	2.6359	1.19216	5.34988	0.00928287	99.6557	99.5575	0.168134	59.371	YES
NAD8473	278457	73.4747	51962.2	33.4326	310.731	238.587	2.34725	1.5351	5.3453	0.00958273	99.7471	99.4746	0.173573	71.9067	YES
NAD8476	336920	98.1806	62909	36.0573	286.177	156.523	1.27575	1.13557	5.34946	0.00639889	99.8836	99.5499	0.115899	94.5245	YES
NAD8479	356677	94.7213	66577.5	36.2822	487.388	194.602	2.70221	1.03057	5.34527	0.00565372	99.7745	99.474	0.102406	58.738	YES
NAD8482	531449	153.338	99116.4	47.7921	729.804	219.944	5.93337	1.2427	5.34406	0.00480869	99.6675	99.4521	0.0871014	58.399	YES
NAD8485	521707	155.258	97449.3	45.9518	1034.61	269.769	3.67704	1.22729	5.3427	0.00480648	99.7952	99.4274	0.0870625	40.501	YES
											weighted mean age (15 of 22):	99.487	0.029	± 2σint
												99.487	0.0666322	± 2σint+J
Sample:	97-O-20		J-value:	0.0104613	7e-06	(2σ)
	40Ar	± 2σ40	39Ar	±2σ39	37Ar	± 2σ37	36Ar	± 2σ36							Included in
File	(cps)	(cps)	(cps)	(cps)	(cps)	(cps)	(cps)	(cps)	40Ar*/39ArK	± 2σ	%40Ar*	Age (Ma)	± 2σ (Ma)	K/Ca	wtd. mean
NAD6476	505406	136.318	94035.9	47.3196	770.447	148.982	1.22791	1.30102	5.37085	0.00514742	99.9295	100.063	0.0933261	52.4828	YES
NAD6479	304747	85.7095	56614.7	33.0799	420.695	151.573	1.30062	1.24165	5.37605	0.00742348	99.8735	100.157	0.134586	57.8666	YES
NAD6482	376921	103.046	70026.1	39.1357	707.761	153.735	2.93876	1.14919	5.37034	0.00593751	99.772	100.054	0.107652	42.5441	YES
NAD6488	414106	120.168	76979.1	43.4448	573.034	162.223	2.14155	1.02658	5.37123	0.00524761	99.8465	100.07	0.0951423	57.7643	YES
NAD6494	420856	110.516	78166.5	37.6491	499.752	160.031	4.80211	1.08212	5.36574	0.00508292	99.6587	99.9703	0.0921614	67.2562	YES
NAD6497	368633	91.5286	68487.9	37.956	474.963	138.158	0.873276	1.35533	5.37868	0.00675428	99.9294	100.205	0.12245	62.0041	YES
NAD6506	478997	138.228	89030.9	40.4881	801.323	116.957	2.65332	1.23161	5.37143	0.00504644	99.8378	100.073	0.0914949	47.7748	YES
NAD6509	499639	154.86	92896.9	48.12	714.24	151.615	3.39061	1.09968	5.36763	0.00480102	99.7987	100.004	0.0870485	55.9273	YES
NAD6512	213065	62.2145	39525.5	25.6024	318.459	134.459	1.85408	1.28581	5.37669	0.0104442	99.742	100.169	0.18935	53.3691	YES
NAD6517	326414	95.6362	60588.5	35.4947	554.28	126.596	2.66352	0.961218	5.37448	0.00590911	99.7598	100.129	0.107132	47.0031	YES
NAD6520	438456	123.695	81533.8	46.8201	560.492	161.621	2.54276	1.02351	5.36832	0.00509032	99.8269	100.017	0.0922932	62.5511	YES
NAD6523	292886	83.7661	54310.8	34.7356	307.886	127.868	2.67794	0.916925	5.37798	0.0063024	99.7253	100.192	0.114259	75.8514	YES
NAD6526	283908	79.5771	52766.1	35.486	302.764	159.126	1.3331	1.52892	5.3729	0.00950093	99.8582	100.1	0.172255	74.9408	YES
NAD6529	384059	105.19	71518.2	37.1088	785.374	133.2	2.3575	1.10905	5.36061	0.00560236	99.8229	99.8773	0.101585	39.1566
NAD6535	302433	84.9949	56272.9	32.7403	643.863	147.851	1.16272	1.34414	5.36864	0.00793494	99.892	100.023	0.143869	37.5813	YES
											weighted mean age (14 of 15):	100.071	0.029	± 2σint
												100.071	0.0729709	± 2σint+J
Sample:	98-O-04		J-value:	0.01046	1.2e-05	(2σ)
	40Ar	± 2σ40	39Ar	±2σ39	37Ar	± 2σ37	36Ar	± 2σ36							Included in
File	(cps)	(cps)	(cps)	(cps)	(cps)	(cps)	(cps)	(cps)	40Ar*/39ArK	± 2σ	%40Ar*	Age (Ma)	± 2σ (Ma)	K/Ca	wtd. mean
NAD8345	610530	180.249	114122	59.7555	775.495	180.528	2.42674	1.056	5.34346	0.00424154	99.8813	99.5542	0.0769139	63.2788	YES
NAD8348	248618	70.9527	46297.8	30.9305	162.102	219.47	1.19475	1.14046	5.36203	0.00833437	99.8516	99.8909	0.151103	122.812
NAD8351	209379	67.8957	39060.5	27.1347	188.693	394.002	0.015753	0.796436	5.36012	0.00739221	99.9948	99.8562	0.134024	89.0121
NAD8354	602542	194.31	112158	57.9564	570.595	220.707	11.2944	1.31161	5.34207	0.00478799	99.4378	99.5289	0.0868241	84.522	YES
NAD8357	392153	112.427	72969.2	41.2567	242.796	250.425	3.95963	1.42488	5.35775	0.00675848	99.6934	99.8134	0.122537	129.231
NAD8360	368931	108.976	68808.5	35.3727	347.911	240	4.17648	1.31118	5.34347	0.00652352	99.6594	99.5544	0.118294	85.0434	YES
NAD8363	280078	83.2806	52229	29.8549	465.807	179.939	3.39787	1.29071	5.34327	0.00815214	99.6409	99.5508	0.147827	48.2137	YES
NAD8366	472294	146.428	88161.6	53.2022	521.314	159.337	4.58747	1.41172	5.34155	0.00600736	99.7087	99.5196	0.108936	72.7189	YES
NAD8369	270555	79.3846	50514.3	27.6935	177.343	169.274	1.94835	1.16024	5.34423	0.00762847	99.7801	99.5682	0.13833	122.481	YES
NAD8372	377173	102.8	70319.4	37.3988	473.077	284.169	3.64974	1.22286	5.34823	0.00611093	99.711	99.6407	0.110807	63.9161	YES
NAD8375	395849	120.528	73801	38.7687	428.961	204.075	3.82729	1.2264	5.34819	0.00593918	99.7098	99.64	0.107693	73.9795	YES
NAD8378	410551	120.092	76645.7	43.6502	359.363	264.916	2.8635	1.72796	5.34517	0.00755968	99.7886	99.5853	0.137081	91.7109	YES
NAD8381	452741	133.976	83238	44.8826	548.328	159.853	5.5474	1.51529	5.41921	0.00638415	99.6338	100.927	0.11568	65.2751
NAD8384	495695	145.977	92381	42.8303	727.888	225.307	6.78003	1.08266	5.34397	0.00457924	99.5932	99.5635	0.083037	54.5738	YES
NAD8387	584171	177.785	109054	48.0484	622.456	170.29	3.42622	1.31521	5.34726	0.00460539	99.8232	99.6231	0.0835085	75.3355	YES
NAD8390	528697	160.051	98512.8	51.7359	631.817	159.57	3.942	1.15938	5.35483	0.00479035	99.7768	99.7603	0.0868559	67.0453
NAD8393	342742	95.2984	63576.9	37.7236	450.827	220.85	1.79621	1.07785	5.3826	0.00617916	99.8439	100.264	0.112006	60.6395
NAD8396	263956	77.9134	49137.5	30.958	335.298	228.899	1.08596	1.40268	5.36521	0.00931415	99.8772	99.9486	0.168861	63.0157
NAD8399	396094	115.529	73540	34.7608	394.445	184.259	3.61258	1.20572	5.37135	0.00574054	99.7256	100.06	0.104067	80.1685
NAD8402	525344	167.629	97692	40.2037	685.09	162.604	2.01539	1.73968	5.37144	0.00601067	99.8857	100.061	0.108964	61.3165
NAD8405	391323	104.819	72642.2	38.6429	644.022	229.084	5.15673	1.23667	5.366	0.00601638	99.6096	99.9628	0.109073	48.5014
NAD8408	460622	131.772	85526.7	53.1303	818.557	275.108	5.01587	1.76712	5.36845	0.00718969	99.6789	100.007	0.130342	44.9281
NAD8411	219557	62.2717	40676.4	25.3653	111.536	159.788	1.36314	1.27845	5.38733	0.0100912	99.8087	100.35	0.182909	156.817
NAD8414	218143	62.2657	40493.7	24.7943	222.558	209.636	1.64445	0.954349	5.37488	0.00793345	99.773	100.124	0.143816	78.2367
											weighted mean age (11 of 24):	99.575	0.03	± 2σint
												99.575	0.118109	± 2σint+J
Sample:	Gott		J-value:	0.0104995	7.7e-06	(2σ)
	40Ar	± 2σ40	39Ar	±2σ39	37Ar	± 2σ37	36Ar	± 2σ36							Included in
File	(cps)	(cps)	(cps)	(cps)	(cps)	(cps)	(cps)	(cps)	40Ar*/39ArK	± 2σ	%40Ar*	Age (Ma)	± 2σ (Ma)	K/Ca	wtd. mean
NAD5100	117045	51.6378	18187.8	16.1111	1042.19	95.4721	16.2671	1.49785	6.17256	0.025404	95.9126	114.946	0.458531	7.50384	YES
NAD5103	62372.5	40.4919	9656.62	13.2041	481.117	74.0189	6.61747	2.02416	6.25807	0.0633451	96.8851	116.489	1.14239	8.63034
NAD5106	62299	38.8082	9842.11	11.8908	413.732	59.3156	5.30771	1.68232	6.17179	0.0517561	97.5004	114.933	0.93418	10.2288	YES
NAD5109	82431.3	45.9852	12922.7	13.8596	165.759	70.7308	7.83206	1.73308	6.1984	0.0407794	97.1707	115.413	0.735861	33.5227	YES
NAD5112	90632.4	48.3249	14568	13.8118	904.439	65.7755	3.88225	1.28077	6.14641	0.0271096	98.7914	114.474	0.489441	6.9258	YES
NAD5115	65362.9	38.7461	10339.4	12.6703	767.109	85.9274	4.33858	1.43222	6.20209	0.0422483	98.1026	115.479	0.762341	5.79543	YES
NAD5121	61027.5	41.3454	7267.03	10.4867	66.6831	71.0602	13.226	1.45316	7.85471	0.0611952	93.5318	145.059	1.08652	46.8605
NAD5124	75778.1	43.8954	11795.8	13.9845	393.379	69.0363	10.5998	1.51184	6.15809	0.0391975	95.8564	114.685	0.707598	12.8936	YES
NAD5127	90068.5	49.3089	13904.8	15.3555	737.69	86.2295	13.899	1.69567	6.18296	0.037279	95.4492	115.134	0.6728	8.10482	YES
NAD5133	57485.3	39.2271	8595.3	11.5964	594.538	71.0727	11.8279	1.32724	6.28238	0.0472061	93.9307	116.928	0.851125	6.21625
NAD5142	65123.2	40.3953	8672.67	11.3438	242.686	44.0629	42.5694	1.89839	6.04534	0.0662797	80.5062	112.649	1.19782	15.3663
NAD5154	51842.3	42.4181	8159.22	10.9638	198.011	72.2274	5.13544	1.78183	6.1674	0.0659668	97.0642	114.853	1.19073	17.7183	YES
NAF0391	239294	86.0456	34173.1	24.3607	618.967	15689.9	99.3445	2.02568	6.13544	0.0425494	87.6178	114.276	0.768277	23.7399	YES
NAF0393	285977	137.601	42492.2	35.1819	4785.71	16037.5	85.9711	2.18737	6.1349	0.0356121	91.149	114.267	0.64302	3.81765	YES
NAF0396	462063	164.62	72358.8	40.8329	1608.87	20113.6	54.8632	1.61259	6.16065	0.0244924	96.4741	114.732	0.442127	19.3389	YES
NAF0398	251064	112.78	39277.5	35.9889	522.801	17899.5	32.6629	2.13076	6.14435	0.0418216	96.1238	114.437	0.75507	32.3052	YES
NAF0403	183772	87.3392	29758.7	27.1088	6550.25	14937.9	9.1661	1.10264	6.10125	0.0437378	98.7841	113.659	0.790001	1.95325
NAF0406	187240	66.017	29998.5	25.9992	114.422	17626	14.3243	1.50149	6.09887	0.0515387	97.7121	113.616	0.930926	112.735
NAF0408	458157	213.595	71818.3	49.2548	273.837	21166.5	56.2059	1.6209	6.14551	0.0260277	96.3336	114.458	0.469914	112.774	YES
NAF0411	350589	115.575	56140.1	38.2427	11595.8	15771.1	36.1741	1.57309	6.06918	0.0253037	97.1725	113.08	0.457185	2.0815
NAF0413	369164	196.362	46272.4	37.5215	8415.68	20655.7	169.186	2.74249	6.90116	0.0421498	86.4907	128.05	0.755357	2.36399
NAF0416	204523	75.6053	32736.9	25.8428	1755.59	17800.1	12.2915	1.30963	6.1393	0.0472	98.265	114.346	0.852217	8.018	YES
NAF0418	186186	82.8529	28437.6	25.5547	296.969	19085.4	37.8159	1.2776	6.15049	0.0579267	93.9404	114.548	1.04578	41.1763	YES
NAF0421	392615	127.681	63005.2	38.665	5254.8	16571.8	28.383	1.38386	6.10339	0.0232899	97.9389	113.698	0.420659	5.15541
NAF0423	200393	90.5375	31332.2	28.7828	12787	17447	27.237	1.34906	6.16972	0.0486211	96.4384	114.895	0.877613	1.05334	YES
NAF0426	211107	80.0088	32460.7	25.1575	409.457	17393.8	36.5329	1.4961	6.16796	0.0470984	94.8403	114.863	0.850142	34.089	YES
NAF0428	198401	79.6286	30218.4	27.9526	1805.96	17881.4	22.4368	1.01996	6.34832	0.0508761	96.6874	118.116	0.916701	7.19473
NAF0431	275905	90.761	40043.9	28.9281	14135.2	25836.2	24.3294	1.07869	6.7377	0.0549232	97.7648	125.119	0.985845	1.21786
NAF1044	375604	145.558	53926.8	47.4006	13115.9	29205.5	161.276	3.39494	6.09192	0.0493534	87.449	113.49	0.891515	1.76766
NAF1047	185015	66.055	28285.8	23.7651	930.596	18169.3	12.8152	1.74026	6.40787	0.0570504	97.9635	119.189	1.02735	13.0697
NAF1049	206519	114.227	32093.2	36.8345	253.4	21408.4	24.6918	1.73093	6.2054	0.0585147	96.4317	115.539	1.05582	54.4593	YES
NAF1052	164081	58.8442	25784.2	23.9182	824.121	18107	14.0325	1.28183	6.20328	0.060769	97.4779	115.501	1.09652	13.4531	YES
NAF1054	193065	95.2752	27604	31.2838	681.564	31014.3	77.8479	1.9854	6.1536	0.0965186	87.9816	114.604	1.74244	17.4151	YES
NAF1057	221188	73.5226	27339.7	25.9189	705.205	26867.4	119.235	2.51352	6.78989	0.0872285	83.9242	126.055	1.56491	16.6701
NAF1059	239455	108.998	28479.9	42.215	14550.2	25258.1	169.742	3.80064	6.67066	0.0853109	79.3104	123.915	1.5323	0.841367
NAF1062	189830	96.1586	29636.9	36.3987	6363.78	30460.3	17.7701	1.88033	6.24357	0.0882424	97.462	116.228	1.59162	2.00226
NAF1064	227701	108.602	33289.2	38.614	1167.91	27853.6	58.4636	2.34496	6.31813	0.0734739	92.367	117.572	1.32427	12.2561
NAF1067	425234	131.025	67236.3	41.9161	2400.24	26245.8	33.9479	1.58889	6.17616	0.0336037	97.6526	115.011	0.606509	12.045	YES
NAF1069	354628	164.517	54989.5	50.0609	138.301	29101.7	35.4212	2.02999	6.25636	0.0460015	97.0126	116.458	0.829621	170.971
NAF1072	492289	168.875	75828.5	44.7958	1253.58	20425.3	81.507	1.94163	6.17205	0.0241433	95.0686	114.937	0.435778	26.0103	YES
NAF1074	314381	144.639	47434.3	44.9701	13818	23238.6	74.9328	2.17442	6.17983	0.043653	93.2234	115.078	0.78786	1.4758	YES
NAF1077	505665	158.339	79322.5	45.3549	11887.8	29597.8	39.2209	2.03985	6.23914	0.0323375	97.8618	116.148	0.583293	2.86892
NAF1079	409627	178.422	63600.7	51.4822	9100.46	26377.2	57.7022	2.25425	6.18113	0.0366556	95.9617	115.101	0.661561	3.00486	YES
NAF1082	147592	55.9052	22094.3	20.2927	15209.8	23301.8	20.4687	1.64077	6.46052	0.0911241	96.6667	120.137	1.64009	0.624337
											weighted mean age (24 of 44):	114.77	0.15	± 2σint
												114.77	0.172001	± 2σint+J
Sample:	68-O-09		J-value:	0.0104552	9.6e-06	(2σ)
	40Ar	± 2σ40	39Ar	±2σ39	37Ar	± 2σ37	36Ar	± 2σ36							Included in
File	(cps)	(cps)	(cps)	(cps)	(cps)	(cps)	(cps)	(cps)	40Ar*/39ArK	± 2σ	%40Ar*	Age (Ma)	± 2σ (Ma)	K/Ca	wtd. mean
NAD6225	136650	64.5914	25853.7	18.9325	198.274	135.554	1.85554	1.61965	5.26417	0.0192677	99.5959	98.072	0.349512	56.0691	YES
NAD6233	196386	73.6399	37125.7	23.8896	219.665	130.106	3.30282	1.15608	5.26314	0.0101015	99.4965	98.0533	0.183241	72.6743	YES
NAD6236	230701	88.5625	43582.3	26.449	351.203	150.4	3.11203	1.49246	5.27227	0.0109116	99.5991	98.2189	0.197919	53.3603	YES
NAD6239	290800	99.9449	55008.6	30.1166	377.838	148.161	3.19006	1.52324	5.26916	0.00894863	99.6725	98.1625	0.162319	62.6025	YES
NAD6242	89615.4	51.154	16782.8	16.0871	192.618	127.348	4.01992	1.43653	5.26861	0.026248	98.6676	98.1525	0.476113	37.4657	YES
NAD6245	259056	85.4348	48873.4	27.0622	380.324	85.9062	5.28802	1.20843	5.26835	0.00813557	99.392	98.1479	0.147572	55.2567	YES
NAD6248	215544	77.7906	40814.9	23.9025	298.162	140.698	1.23238	1.29398	5.27206	0.0101427	99.83	98.2152	0.183972	58.8617	YES
NAD6251	136676	57.2917	25692.3	21.9897	336.344	129.644	2.87896	1.57239	5.2868	0.018967	99.3804	98.4825	0.343981	32.846	YES
											weighted mean age (8 of 8):	98.168	0.071	± 2σint
												98.168	0.114743	± 2σint+J
Sample:	97-O-01		J-value:	0.0104552	9.6e-06	(2σ)
	40Ar	± 2σ40	39Ar	±2σ39	37Ar	± 2σ37	36Ar	± 2σ36							Included in
File	(cps)	(cps)	(cps)	(cps)	(cps)	(cps)	(cps)	(cps)	40Ar*/39ArK	± 2σ	%40Ar*	Age (Ma)	± 2σ (Ma)	K/Ca	wtd. mean
NAD8273	452614	139.238	77999.3	41.933	619.644	224.307	11.4734	1.22769	5.759	0.00592111	99.2447	106.975	0.106834	54.1271
NAD8276	376190	118.517	68240.4	38.5991	302.273	267.191	4.94178	2.33458	5.49093	0.0108246	99.6044	102.131	0.195824	97.0754
NAD8279	219327	71.7287	37903.7	28.839	5.39851	232.064	6.2363	1.26735	5.73679	0.0110851	99.1419	106.574	0.20005	3019.09
NAD8282	230091	73.9596	37872.5	27.1954	115.325	256.803	5.87121	1.1283	6.02885	0.0101135	99.2332	111.837	0.181991	141.211
NAD8285	340200	108.972	61191.6	35.4781	301.445	182.039	2.71259	1.00469	5.54622	0.00613612	99.7592	103.131	0.110946	87.2872
NAD8288	443065	148.916	80678.8	44.2558	685.489	149.61	2.45226	1.15052	5.48281	0.00553469	99.8372	101.984	0.100134	50.6087
NAD8291	372263	120.99	66073.2	39.4471	483.9	203.556	4.0448	1.24929	5.61589	0.00682639	99.6763	104.391	0.123341	58.7132
NAD8294	574132	190.756	98932.7	52.8962	686.718	243.136	14.1786	2.15332	5.7605	0.00745757	99.2628	107.002	0.134554	61.9481
NAD8300	304623	87.4338	55760.1	36.4452	625.458	290.788	2.3229	1.0176	5.45105	0.00671439	99.7787	101.41	0.121516	38.3346	YES
NAD8303	404306	118.009	74167	40.9166	549.627	162.403	1.27792	1.24074	5.44622	0.00604608	99.9065	101.322	0.109426	58.0242	YES
NAD8306	190412	58.5858	34662.2	26.6227	531.811	220.114	2.51362	1.35144	5.47245	0.0125075	99.6181	101.797	0.22631	28.0261
NAD8309	248565	72.926	42931.8	29.0333	311.776	205.272	2.28482	1.10812	5.77394	0.00881813	99.7262	107.244	0.159081	59.2111
NAD8312	465560	144.178	85170.4	43.5977	713.043	180.016	4.38902	1.3092	5.45099	0.00563805	99.7208	101.409	0.102036	51.3616	YES
NAD8315	595260	193.332	108674	55.0948	1834.61	265.391	11.7386	1.47621	5.44608	0.00523117	99.4258	101.32	0.0946772	25.4711	YES
NAD8324	282269	78.3849	49455.2	32.433	14.0799	236.564	6.2647	1.10304	5.66922	0.00781176	99.3283	105.354	0.141071	1510.37
NAD8327	305979	89.9486	54419.3	36.4923	746.552	214.52	3.44177	1.02069	5.60434	0.00695793	99.6739	104.182	0.125733	31.3442
NAD8333	568798	179.901	101167	56.7519	556.531	322.876	7.99205	1.30951	5.59871	0.00530239	99.5786	104.08	0.0958216	78.1656
NAD8336	337384	99.3131	56137.1	32.7423	91.9323	298.527	7.48523	1.68893	5.96978	0.00981312	99.3308	110.774	0.176689	262.573
NAD8339	126245	51.2741	22992.8	20.32	155.732	178.829	3.50875	1.06973	5.44512	0.0148957	99.1701	101.302	0.269594	63.4862	YES
											weighted mean age (5 of 19):	101.359	0.051	± 2σint
												101.359	0.106126	± 2σint+J
Sample:	97-O-13		J-value:	0.0104542	1.1e-05	(2σ)
	40Ar	± 2σ40	39Ar	±2σ39	37Ar	± 2σ37	36Ar	± 2σ36							Included in
File	(cps)	(cps)	(cps)	(cps)	(cps)	(cps)	(cps)	(cps)	40Ar*/39ArK	± 2σ	%40Ar*	Age (Ma)	± 2σ (Ma)	K/Ca	wtd. mean
NAD9219	501525	161.852	91857.7	45.0212	504.164	221.38	6.45695	1.27799	5.43874	0.00524969	99.6137	101.226	0.0950554	78.3449
NAD9222	269957	84.2372	48658.9	33.4786	370.242	228.826	2.06158	1.17357	5.53539	0.00834091	99.7731	102.976	0.150883	56.5122	YES
NAD9225	605659	198.614	109063	51.2467	710.288	272.925	3.89579	1.26819	5.54262	0.0047139	99.8075	103.107	0.0852663	66.0253	YES
NAD9228	606155	192.842	109197	53.115	308.525	252.948	3.76673	1.2502	5.54043	0.00470432	99.8088	103.067	0.0850949	152.191	YES
NAD9231	275084	89.0179	49517.4	29.2939	241.657	183.734	0.465563	1.2333	5.55236	0.008332	99.9467	103.283	0.150697	88.1102
NAD9234	297571	91.9923	53356.3	34.3514	271.503	226.448	3.60183	1.38245	5.55678	0.00870797	99.6362	103.363	0.15749	84.5042
NAD9237	352044	99.2356	63206.6	38.2762	246.374	195.243	1.75464	1.09943	5.56123	0.00639348	99.847	103.443	0.115626	110.315
NAD9240	538969	177.613	97014.7	51.9725	361.563	218.787	4.51461	1.7134	5.54142	0.00632838	99.7455	103.085	0.114471	115.377	YES
NAD9243	273811	81.0433	49265.1	32.4922	13.1052	258.465	0.845654	0.940579	5.55226	0.00698744	99.8985	103.281	0.126379	1616.45
NAD9246	521509	156.295	93809.6	51.3773	227.419	228.07	1.74691	1.58641	5.55334	0.00613012	99.8937	103.3	0.110872	177.373
NAD9252	216134	70.0681	38781.8	28.0916	122.977	260.593	2.86574	0.989886	5.55073	0.00882865	99.5989	103.253	0.159682	135.604
NAD9255	295995	88.1568	53175.4	34.4332	176.986	211.959	0.818344	0.962976	5.56154	0.00671439	99.9125	103.449	0.121429	129.193
NAD9258	345039	110.609	62021	37.7906	182.08	234.587	5.01202	1.20283	5.53884	0.0069496	99.5608	103.038	0.125711	146.468	YES
NAD9261	355791	107.63	63936.5	37.4642	356.486	197.685	4.53081	1.30285	5.54353	0.00710952	99.618	103.123	0.128598	77.1211	YES
NAD9264	206905	70.2604	37234.6	24.8982	136.177	225.428	1.55965	0.909616	5.54405	0.00841525	99.7704	103.132	0.152215	117.574	YES
NAD9267	216109	61.9793	38930.9	28.7753	205.635	198.311	1.96265	1.75262	5.53595	0.0141493	99.7267	102.986	0.255954	81.4076	YES
NAD9270	582210	190.79	104851	60.0368	288.501	314.437	3.57068	1.73184	5.54225	0.00614819	99.8111	103.1	0.11121	156.276	YES
NAD9273	499933	153.211	89679.5	43.7942	349.854	275.127	9.22701	1.72075	5.54373	0.00657365	99.4448	103.127	0.118905	110.223	YES
NAD9276	454671	139.803	82104.1	48.1626	570.814	257.26	7.68801	1.40502	5.50982	0.00629469	99.4953	102.513	0.113897	61.8496
NAD9279	349903	104.925	63208.5	39.9957	626.602	246.574	2.99791	0.946533	5.52182	0.00592607	99.7486	102.73	0.107214	43.3759
NAD9282	528223	160.25	95063.9	48.2452	334.487	247.189	4.7717	1.21474	5.54127	0.00503932	99.7256	103.082	0.0911538	122.209	YES
											weighted mean age (11 of 21):	103.084	0.034	± 2σint
												103.084	0.11367	± 2σint+J
Sample:	93-O-21		J-value:	0.010453	9e-06	(2σ)
	40Ar	± 2σ40	39Ar	±2σ39	37Ar	± 2σ37	36Ar	± 2σ36							Included in
File	(cps)	(cps)	(cps)	(cps)	(cps)	(cps)	(cps)	(cps)	40Ar*/39ArK	± 2σ	%40Ar*	Age (Ma)	± 2σ (Ma)	K/Ca	wtd. mean
NAD6416	395803	129.92	69559.4	43.3899	588.854	177.775	4.37021	1.29124	5.67155	0.00684455	99.6726	105.425	0.123635	50.7942
NAD6419	214501	70.5187	37695.6	27.7882	337.882	107.319	3.63259	1.43443	5.66178	0.0122567	99.4974	105.249	0.221418	47.9725
NAD6425	490733	151.682	86839	48.6132	761.484	162.048	2.97002	1.80598	5.64104	0.00718582	99.822	104.874	0.129839	49.0366	YES
NAD6428	367568	107.585	64896.2	35.8934	574.459	95.9805	4.27011	1.83353	5.64448	0.00915048	99.656	104.936	0.165332	48.5765	YES
NAD6431	463385	141.205	82023.9	43.0739	797.487	129.835	3.5811	1.59672	5.63662	0.00674986	99.7733	104.794	0.121967	44.2265	YES
NAD6434	345467	100.914	61096.2	39.5506	385.744	138.288	0.0167326	1.28957	5.65438	0.00747494	99.9978	105.115	0.135045	68.1054
NAD6437	545357	165.986	96541.2	41.1931	755.848	141.353	4.1038	1.41592	5.63638	0.00528724	99.7767	104.79	0.0955382	54.9217	YES
NAD6443	504164	155.857	89113.1	45.5251	855.696	180.516	4.14379	1.26367	5.64394	0.00541898	99.7585	104.927	0.0979113	44.7804	YES
NAD6446	548670	173.644	96795.4	53.7049	708.064	151.879	3.49714	1.25359	5.65763	0.00529875	99.8104	105.174	0.0957261	58.7826
NAD6449	298384	91.1315	52884.2	32.5673	435.072	120.663	0.0619693	1.30229	5.64201	0.00831458	99.9958	104.892	0.150233	52.2674	YES
NAD6452	535650	180.682	94810.3	50.7129	760.582	127.864	3.00366	1.59775	5.64038	0.00617179	99.8343	104.862	0.111517	53.6013	YES
NAD6455	290982	91.0851	51627	33.9853	370.031	124.11	0.0706734	2.04223	5.63588	0.012506	99.9932	104.781	0.22598	59.9936	YES
NAD6458	547851	165.264	97120.7	52.3217	764.019	118.678	4.08513	1.43928	5.62848	0.00563181	99.7788	104.647	0.101772	54.6605
NAD6461	371561	110.777	65677.2	37.4835	574.36	219.891	3.44878	1.54134	5.64189	0.00790199	99.7256	104.89	0.142778	49.1696	YES
NAD6464	223805	69.7703	39678.3	33.3244	351.972	175.138	2.79659	0.974662	5.61964	0.00891368	99.6298	104.488	0.161093	48.4742
NAD6467	533556	162.213	94344.4	49.2497	726.762	171.326	4.51709	1.72757	5.64121	0.00644849	99.7485	104.877	0.116516	55.82	YES
NAD6470	546498	169.035	96701.6	51.49	815.734	174.229	3.87424	1.34787	5.63959	0.00542685	99.7906	104.848	0.0980578	50.9743	YES
NAD6473	309940	97.8867	54752.1	36.1483	489.017	106.459	2.33099	1.63572	5.64827	0.00983604	99.7784	105.005	0.177712	48.144	YES
											weighted mean age (12 of 18):	104.866	0.035	± 2σint
												104.866	0.0968357	± 2σint+J
Sample:	90-O-51		J-value:	0.010453	9e-06	(2σ)
	40Ar	± 2σ40	39Ar	±2σ39	37Ar	± 2σ37	36Ar	± 2σ36							Included in
File	(cps)	(cps)	(cps)	(cps)	(cps)	(cps)	(cps)	(cps)	40Ar*/39ArK	± 2σ	%40Ar*	Age (Ma)	± 2σ (Ma)	K/Ca	wtd. mean
NAD6354	522008	163.34	99412.8	49.3607	694.356	125.692	6.28048	1.31958	5.23209	0.00502131	99.641	97.47	0.0910966	61.5639	YES
NAD6360	372260	123.333	70724.2	41.8586	648.608	150.928	7.45015	1.57364	5.23232	0.00754375	99.406	97.4742	0.136858	46.8869	YES
NAD6363	474220	146.453	90341.6	47.997	779.191	213.944	5.08917	1.60886	5.23254	0.00622204	99.6823	97.4783	0.11288	49.8551	YES
NAD6366	415162	138.922	79094.4	39.9159	897.648	120.239	4.29471	1.36577	5.23313	0.00605771	99.698	97.4889	0.109898	37.8883	YES
NAD6372	372520	102.518	70931.9	38.3188	551.513	160.148	0.752766	1.61721	5.24873	0.00751723	99.9411	97.7719	0.136355	55.3034
NAD6375	378839	107.568	72070.4	36.4426	405.103	131.123	4.17508	1.64871	5.23914	0.00748088	99.6692	97.5979	0.135708	76.4995	YES
NAD6378	166324	63.352	31562.3	23.2722	103.894	119.599	3.56928	1.49144	5.23568	0.0147738	99.354	97.5351	0.268016	130.631	YES
NAD6381	152288	61.7405	28809.7	22.7994	125.876	121.956	3.73658	1.2761	5.24711	0.0140393	99.2638	97.7425	0.254662	98.4158
NAD6384	341362	101.679	64954.2	40.3412	535.558	131.19	5.13076	1.52106	5.23198	0.00787488	99.5534	97.468	0.142866	52.1515	YES
NAD6387	411433	122.883	78239.1	42.7743	448.177	162.711	5.59155	1.30833	5.23726	0.00597395	99.5926	97.5639	0.108374	75.0656	YES
NAD6390	156235	58.221	29024	24.8607	267.845	185.69	9.13078	1.77656	5.28925	0.0189616	98.2587	98.5068	0.343806	46.5949
NAD6393	562252	171.761	106732	51.7077	702.324	189.792	3.35964	1.3446	5.25847	0.00482403	99.8212	97.9485	0.0874945	65.347
NAD6396	291397	94.7113	55016.8	33.254	354.407	144.999	4.73322	1.11408	5.27082	0.00705777	99.5145	98.1725	0.127993	66.7512
NAD6399	465483	147.14	88399.1	49.341	634.785	123.131	8.0475	1.12475	5.23858	0.00508458	99.4844	97.5877	0.0922384	59.8808	YES
NAD6402	579467	194.026	110001	58.1467	755.565	117.712	3.55062	1.32797	5.25824	0.00488511	99.8171	97.9444	0.0886025	62.6022
NAD6405	335728	104.101	63656.7	37.1139	397.818	185.605	1.4787	1.49247	5.26709	0.00782219	99.8676	98.1049	0.141861	68.806
NAD6408	271223	88.0353	51398	34.1464	267.732	173.943	3.39129	1.1091	5.25711	0.00753714	99.6243	97.9239	0.136705	82.5491
NAD6411	418430	125.87	79338.6	42.4886	448.833	129.5	3.21266	1.28347	5.26181	0.0058172	99.769	98.0092	0.105504	76.0092
											weighted mean age (9 of 18):	97.519	0.038	± 2σint
												97.519	0.0921622	± 2σint+J
Sample:	95-O-04		J-value:	0.0077864	6.1e-06	(2σ)
	40Ar	± 2σ40	39Ar	±2σ39	37Ar	± 2σ37	36Ar	± 2σ36							Included in
File	(cps)	(cps)	(cps)	(cps)	(cps)	(cps)	(cps)	(cps)	40Ar*/39ArK	± 2σ	%40Ar*	Age (Ma)	± 2σ (Ma)	K/Ca	wtd. mean
NAD9147	409235	124.762	73146.3	43.8278	1104.62	214.639	4.47867	1.14243	5.57718	0.00599585	99.685	103.878	0.108566	28.4737
NAD9150	555963	181.164	100864	56.2289	729.674	196.964	4.29296	1.7777	5.49938	0.00635482	99.77	102.469	0.115155	59.4391
NAD9153	589665	191.934	106039	53.2437	314.807	203.245	4.46069	1.277	5.548	0.00490158	99.7687	103.35	0.0887783	144.839
NAD9156	553583	182.631	98808	54.6875	323.773	295.937	5.60367	1.33576	5.58541	0.00542074	99.6928	104.027	0.098145	131.226
NAD9159	329728	97.5437	59713.7	37.1075	152.907	213.483	2.57976	1.13975	5.50859	0.00685602	99.7603	102.636	0.124226	167.924
NAD9162	458127	142.085	82935.1	49.901	389.448	194.101	2.51242	1.50174	5.51472	0.00657617	99.8332	102.747	0.119148	91.5706
NAD9165	245765	69.0335	44385.8	29.9178	161.955	351.82	2.69506	1.15064	5.51866	0.00875695	99.6681	102.818	0.158653	117.847
NAD9168	218166	69.8939	39198.6	30.2091	429.865	240.397	2.93257	1.35929	5.5437	0.0113589	99.6046	103.272	0.205743	39.2106
NAD9171	362675	108.392	64941.6	41.3319	361.635	211.053	4.5651	1.34568	5.56358	0.0073325	99.6224	103.632	0.132787	77.2181
NAD9174	227747	72.2007	40686.4	29.0848	141.771	273.203	3.13632	1.20976	5.57435	0.00991354	99.5841	103.827	0.179509	123.404
NAD9177	499573	156.764	91240.1	49.4404	503.712	223.253	5.00801	1.09059	5.4589	0.00495292	99.6988	101.735	0.0897873	77.8879
NAD9180	333394	97.9698	60707.4	38.562	707.102	200.17	4.29494	1.26043	5.47113	0.00729892	99.6223	101.957	0.1323	36.9168
NAD9183	546363	168.333	100280	47.5773	884.008	169.389	5.21859	1.35562	5.43302	0.00508024	99.7177	101.266	0.092119	48.778	YES
NAD9189	511668	164.927	93902.4	50.6512	692.295	184.433	5.58898	1.36771	5.43124	0.00553718	99.6747	101.234	0.100406	58.3246	YES
NAD9192	443794	145.85	80754.6	42.3258	613.14	182.19	4.62273	1.50305	5.47858	0.00651719	99.6901	102.092	0.118122	56.6335
NAD9195	347557	105.529	63643.5	39.1727	657.486	184.396	7.36996	1.14508	5.42674	0.00655446	99.372	101.152	0.118858	41.623	YES
NAD9198	431525	131.189	79088.8	40.2021	667.688	189.922	3.34056	1.4896	5.44375	0.00648876	99.7712	101.461	0.117647	50.9339
NAD9204	516114	161.065	92922.4	49.1326	314.767	160.907	6.39851	1.41832	5.53343	0.00569357	99.625	103.086	0.103138	126.94
NAD9207	401711	131.42	72332.5	37.4468	525.753	193.174	4.84482	1.5315	5.53373	0.00718173	99.6406	103.091	0.130095	59.1586
NAD9210	483861	158.582	88051.6	46.3812	884.534	188.353	4.20652	1.60802	5.48123	0.0064329	99.7451	102.14	0.116591	42.8043
NAD9213	612614	197.245	112471	60.3678	871.175	220.11	6.20913	1.79921	5.43047	0.00587027	99.6987	101.22	0.106447	55.5139	YES
NAD9216	271315	84.719	49288.1	29.8149	205.732	168.05	1.68464	1.08028	5.49427	0.00754607	99.8108	102.376	0.136748	103.017
											weighted mean age (4 of 22):	101.225	0.051	± 2σint
												101.225	0.0942853	± 2σint+J
Sample:	98-O-08		J-value:	0.0104694	9.7e-06	(2σ)
	40Ar	± 2σ40	39Ar	±2σ39	37Ar	± 2σ37	36Ar	± 2σ36							Included in
File	(cps)	(cps)	(cps)	(cps)	(cps)	(cps)	(cps)	(cps)	40Ar*/39ArK	± 2σ	%40Ar*	Age (Ma)	± 2σ (Ma)	K/Ca	wtd. mean
NAD9075	212446	70.4224	36951.7	29.8548	183.475	234.524	0.0977545	1.45512	5.74836	0.0127951	99.9837	106.975	0.231288	86.6014
NAD9078	310946	95.0226	54024.6	33.0522	343.366	271.451	1.31367	1.02247	5.74836	0.006899	99.8732	106.975	0.124709	67.6551
NAD9084	240725	75.7199	42059	30.5452	313.007	221.637	1.61511	0.985574	5.71213	0.00834612	99.8005	106.32	0.150921	57.7791	YES
NAD9087	225877	79.4911	39472.2	28.0372	339.204	246.004	1.13792	1.01378	5.71401	0.00892438	99.852	106.354	0.161375	50.0376	YES
NAD9090	237174	78.9881	41418.7	28.2348	240.949	196.358	2.55423	1.4762	5.70778	0.0115004	99.6771	106.241	0.207969	73.9159	YES
NAD9096	293425	90.0947	51035	32.1118	292.456	366.013	5.26389	1.15766	5.71862	0.00790094	99.4629	106.437	0.142862	75.0368	YES
NAD9105	264902	72.8955	46241.5	32.3354	312.373	184.216	1.56552	1.6202	5.71857	0.0113169	99.8235	106.437	0.204628	63.6539	YES
NAD9108	460981	142.666	80460.7	50.1495	563.826	220.76	4.82675	1.06603	5.7114	0.00562092	99.6876	106.307	0.101643	61.3628	YES
NAD9111	222679	70.9996	38933.7	31.4425	348.459	203.677	1.50068	1.46293	5.70813	0.012276	99.8017	106.248	0.221993	48.0441	YES
NAD9114	255506	77.1761	44601.2	28.2628	415.085	277.992	1.18159	1.10874	5.72102	0.00845725	99.8654	106.481	0.152917	46.2035	YES
NAD9117	346855	98.0961	60556	37.442	295.105	238.957	1.73441	1.18383	5.71914	0.0070243	99.848	106.447	0.12701	88.2363	YES
NAD9120	288894	88.0746	50513.8	31.2817	371.233	173.174	1.96049	1.66253	5.70759	0.0105934	99.7981	106.238	0.191568	58.51	YES
NAD9123	548457	164.685	95692.7	48.8119	675.386	223.642	5.46091	1.21738	5.71445	0.00509638	99.703	106.362	0.0921546	60.9246	YES
NAD9126	342318	105.249	59828.7	37.5319	441.755	185.268	2.55114	1.27842	5.70899	0.00753283	99.7783	106.263	0.136219	58.2363	YES
NAD9129	435298	130.432	73225.3	40.5773	430.34	272.91	5.84284	1.18011	5.92076	0.00610513	99.598	110.089	0.110171	73.1671
NAD9132	530933	168.104	92679.8	42.7079	645.447	205.932	5.21304	1.30958	5.71193	0.00530003	99.707	106.316	0.0958395	61.7434	YES
NAD9135	319437	99.1862	55516.7	35.1982	231.722	338.556	6.41134	1.27852	5.71922	0.00800201	99.3971	106.448	0.144689	103.021	YES
NAD9138	434024	124.779	75733.3	41.6566	329.065	211.963	2.67903	1.01133	5.72021	0.00534801	99.8123	106.466	0.0966993	98.9629	YES
NAD9141	429814	140.343	73961.5	41.4659	405.218	285.655	3.76465	1.11346	5.79604	0.00587548	99.7367	107.837	0.106157	78.4844
NAD9144	337819	97.1066	59713.3	41.3936	145.449	239.463	1.51984	1.36491	5.64941	0.00804412	99.8595	105.186	0.14555	176.534
											weighted mean age (15 of 20):	106.368	0.044	± 2σint
												106.368	0.107927	± 2σint+J
Sample:	97-O-12		J-value:	0.010476	1.1e-05	(2σ)
	40Ar	± 2σ40	39Ar	±2σ39	37Ar	± 2σ37	36Ar	± 2σ36							Included in
File	(cps)	(cps)	(cps)	(cps)	(cps)	(cps)	(cps)	(cps)	40Ar*/39ArK	± 2σ	%40Ar*	Age (Ma)	± 2σ (Ma)	K/Ca	wtd. mean
NAD9002	346624	97.8757	62891.4	34.2421	201.465	222.515	0.65285	1.21121	5.5081	0.0066764	99.9386	102.69	0.121044	134.233	YES
NAD9005	378164	108.98	68469.9	38.3656	269.787	245.336	2.02681	1.11532	5.51402	0.00598754	99.8359	102.797	0.108548	109.131	YES
NAD9008	544041	165.201	98302.9	45.963	3334.46	188.326	9.51847	1.1968	5.5077	0.00477051	99.5164	102.683	0.0864902	12.6765	YES
NAD9011	447319	134.925	81176.9	44.5655	363.162	193.306	4.72873	0.911223	5.49286	0.0048151	99.681	102.414	0.0873114	96.1168
NAD9014	345601	104.133	62921.3	40.0803	838.957	231.941	2.75241	1.07305	5.4801	0.00640296	99.7716	102.182	0.116119	32.2494
NAD9017	497137	139.595	90698.4	49.4435	694.185	326.261	2.05832	0.874193	5.47453	0.00443477	99.8776	102.081	0.0804296	56.1812
NAD9020	479876	148.56	87093.2	44.0289	195.498	280.369	1.52184	1.97877	5.50434	0.00753347	99.8987	102.622	0.136588	191.562	YES
NAD9023	268371	78.5366	48897.5	29.5669	414.469	242.438	2.23198	0.927057	5.47499	0.00676783	99.7541	102.089	0.122742	50.7294
NAD9027	275863	88.1539	50053.7	34.8107	378.35	289.885	2.60677	0.854474	5.49589	0.00663334	99.7189	102.468	0.120278	56.8864
NAD9030	285359	83.6149	51377.4	32.3724	433.674	229.071	1.71096	0.995767	5.54439	0.00696539	99.8233	103.348	0.126238	50.9419
NAD9033	260943	77.9006	47091.9	30.2746	515.26	293.184	2.02614	1.35935	5.52867	0.00948509	99.7741	103.063	0.171931	39.2993
NAD9039	537722	177.523	96398.9	55.4015	1048.95	242.693	3.35189	1.52625	5.56808	0.00600471	99.8196	103.777	0.108801	39.5167
NAD9042	408829	139.057	73303.9	44.6022	404.967	188.878	1.35021	1.6488	5.5716	0.00776252	99.8996	103.841	0.140647	77.8349
NAD9045	359233	106.859	64332.7	38.3891	291.394	170.933	3.08815	0.817732	5.56949	0.00532097	99.7401	103.803	0.0964113	94.9331	YES
NAD9048	318760	95.9232	56889.2	32.3014	437.028	281.26	3.74337	1.59765	5.58364	0.00913427	99.6506	104.059	0.165482	55.9741
NAD9051	374091	113.749	67143.8	40.8694	284.793	245.515	2.68021	1.5104	5.55938	0.0077181	99.7824	103.619	0.139859	101.378
NAD9054	370706	112.993	66907.8	40.0627	365.471	292.777	1.53493	1.25333	5.53362	0.00672816	99.8744	103.152	0.121952	78.7209
NAD9057	331483	107.3	59728.4	35.8458	402.567	223.517	3.21284	1.19507	5.5338	0.00707833	99.7105	103.156	0.128298	63.7983
NAD9060	531861	175.738	95475.6	52.7331	535.875	213.811	7.41204	1.13696	5.54739	0.00505271	99.5822	103.402	0.0915705	76.6118
NAD9066	381433	104.751	68564.9	39.574	337.141	272.565	5.40856	1.15675	5.53941	0.00617445	99.5739	103.257	0.111909	87.4494
NAD9069	488195	137.717	88526.3	47.2757	890.007	235.775	2.10068	1.39211	5.50789	0.00576063	99.8762	102.686	0.104441	42.7705
NAD9072	610413	198.431	110860	53.9085	524.223	354.388	3.56213	1.58256	5.49644	0.00534869	99.8228	102.478	0.0969836	90.9336
											weighted mean age (5 of 22):	102.699	0.047	± 2σint
												102.699	0.117633	± 2σint+J
Sample:	97-O-12		J-value:	0.0077864	6.1e-06	(2σ)
	40Ar	± 2σ40	39Ar	±2σ39	37Ar	± 2σ37	36Ar	± 2σ36							Included in
File	(cps)	(cps)	(cps)	(cps)	(cps)	(cps)	(cps)	(cps)	40Ar*/39ArK	± 2σ	%40Ar*	Age (Ma)	± 2σ (Ma)	K/Ca	wtd. mean
NAF5855	435854	220.891	71773.4	71.348	1797.71	1584.39	3.00806	2.20564	7.49713	0.00936627	99.8497	103.854	0.126134	14.1713
NAF5858	445313	156.309	73901.5	37.4683	767.201	1345.46	6.5833	1.3748	7.40464	0.00576573	99.641	102.608	0.077699	34.0983	YES
NAF5863	266160	90.1865	44394.3	31.7547	1135.03	1343.62	0.48899	1.15975	7.40306	0.00820938	99.9754	102.587	0.110631	13.7709	YES
NAF5865	222628	119.841	37189.8	42.6467	1280.81	1000.93	2.68507	1.57601	7.37427	0.0128579	99.7359	102.199	0.173311	10.2062
NAF5868	253063	78.6463	42202.7	28.5331	94.435	905.965	0.818816	1.60548	7.41016	0.0115033	99.9163	102.682	0.155013	156.948	YES
NAF5870	227041	133.459	37921.8	46.0477	322.38	1517.25	0.0559427	1.7206	7.40457	0.0139637	99.9958	102.607	0.188175	41.3728	YES
NAF5873	410004	180.182	68209.7	58.0109	1064.1	1405.47	3.79209	1.84252	7.41524	0.00825395	99.7836	102.751	0.111222	22.5824	YES
NAF5875	353170	169.795	58834.4	43.795	112.526	1386.26	1.43297	2.14532	7.41333	0.011069	99.8952	102.725	0.149156	184.88	YES
NAF5878	354041	134.986	58904.1	47.1685	148.608	1153.44	2.22271	1.79344	7.41239	0.00924219	99.8412	102.712	0.124541	140.377	YES
NAF5880	312748	168.816	51880.4	55.5293	1513.33	1457.16	1.2255	2.09301	7.44082	0.012279	99.928	103.095	0.165428	12.1238
NAF5883	317897	138.881	51792.7	50.2907	511.82	950.04	19.4974	1.86167	7.45425	0.0108465	98.4948	103.276	0.146115	35.9004
NAF5885	254745	135.75	41879.4	47.4399	48.0207	902.461	5.62559	1.77425	7.45792	0.0127824	99.4533	103.326	0.172188	307.962
NAF5888	434486	174.949	72077.8	60.6444	356.295	1525.58	2.81159	1.94191	7.41322	0.0082431	99.8386	102.723	0.111077	71.8691	YES
NAF5890	326860	162.178	54310	50.5953	371.326	1015.45	1.16611	1.79832	7.4068	0.0100145	99.9128	102.637	0.134953	51.5654	YES
NAF5893	264259	97.578	43368.8	34.8165	185.637	1450.32	0.505124	1.63048	7.51455	0.0115761	99.9506	104.088	0.155874	82.2683
NAF5895	288184	142.898	48105.3	47.8638	81.655	1572.09	1.33928	1.67635	7.3829	0.0107661	99.8811	102.315	0.145107	207.219
NAF5898	468660	175.21	77606	62.8498	775.305	1712.54	1.82106	1.87135	7.44044	0.00743999	99.9077	103.09	0.100235	35.5593
NAF5903	291781	114.3	48388.1	41.2305	814.782	928.996	2.81232	1.44968	7.40434	0.00909348	99.7738	102.604	0.122544	21.0639	YES
NAF5905	331420	165.106	54896.2	52.6682	159.061	1059.53	3.21605	1.60788	7.41189	0.0088991	99.7572	102.706	0.119918	122.369	YES
NAF5908	329940	115.31	54847.3	45.6112	1225.08	1070.57	0.805985	1.39885	7.40867	0.00779432	99.9568	102.662	0.105033	15.8652	YES
NAF5910	439951	209.69	71414.6	59.937	90.3156	1309.1	38.3304	2.08385	7.42955	0.0088524	97.8537	102.944	0.119273	280.226
											weighted mean age (12 of 21):	102.662	0.033	± 2σint
												102.662	0.0869341	± 2σint+J
Sample:	93-O-25		J-value:	0.0104624	7.3e-06	(2σ)
	40Ar	± 2σ40	39Ar	±2σ39	37Ar	± 2σ37	36Ar	± 2σ36							Included in
File	(cps)	(cps)	(cps)	(cps)	(cps)	(cps)	(cps)	(cps)	40Ar*/39ArK	± 2σ	%40Ar*	Age (Ma)	± 2σ (Ma)	K/Ca	wtd. mean
NAD6538	306348	83.3945	57132.7	35.9934	409.198	128.91	2.75086	0.918954	5.34771	0.00605294	99.7324	99.6536	0.10978	60.0369	YES
NAD6541	317645	89.6671	59157.7	36.9119	445.758	120.261	4.06322	1.17407	5.34904	0.00697568	99.6191	99.6776	0.126514	57.066	YES
NAD6547	523166	146.083	97589.8	48.2748	842.046	174.805	4.12139	1.12944	5.34844	0.0046081	99.7675	99.6667	0.0835748	49.835	YES
NAD6550	542154	154.954	101364	53.4702	775.384	187.448	1.93118	1.15598	5.34302	0.00468123	99.8949	99.5684	0.0849058	56.2122	YES
NAD6553	500721	148.415	93485.2	49.8269	682.659	143.321	2.93939	1.29104	5.34683	0.0052618	99.8254	99.6375	0.0954322	58.8851	YES
NAD6556	609126	183.905	113534	50.2877	718.249	205.715	7.48496	1.15643	5.34545	0.00418828	99.6324	99.6125	0.0759631	67.9699	YES
NAD6562	294463	87.8694	54731.2	34.1242	354.685	182.072	1.23926	1.45344	5.3734	0.0087617	99.8738	100.119	0.158867	66.3526
NAD6565	307374	95.067	57371.2	32.3815	465.328	171.665	1.89754	1.48609	5.34789	0.00847113	99.8176	99.6569	0.153638	53.0153	YES
NAD6568	221583	69.878	41224.7	28.1774	165.03	154.268	1.58452	0.942658	5.36333	0.00794192	99.7823	99.9367	0.144017	107.414
NAD6571	237898	72.6179	43975.8	31.1748	346.493	156.796	5.47853	0.836961	5.37266	0.00705765	99.314	100.106	0.12797	54.5741
NAD6574	342263	103.284	63707.1	38.0326	576.107	168.902	2.96477	1.06157	5.35876	0.00614119	99.7446	99.854	0.111368	47.55
NAD6577	536026	149.781	100082	47.1319	701.745	158.754	2.42506	1.3741	5.3487	0.00504205	99.8652	99.6715	0.0914449	61.3255	YES
NAD6580	550368	166.584	102751	46.337	745.384	208.031	4.36374	1.09786	5.34369	0.00432057	99.7639	99.5806	0.0783637	59.2753	YES
NAD6583	513056	154.129	95715.4	47.2994	656.367	121.163	4.55516	1.05227	5.34605	0.00451597	99.735	99.6234	0.0819058	62.7049	YES
NAD6586	210898	66.933	39290.5	25.2448	304.015	159.906	3.56647	1.02036	5.34065	0.00866181	99.4965	99.5254	0.157107	55.5723	YES
NAD6589	203949	65.3426	37493.2	24.2976	316.028	191.563	10.2093	1.05893	5.35849	0.00931398	98.5078	99.8491	0.168906	51.0144
											weighted mean age (11 of 16):	99.624	0.028	± 2σint
												99.624	0.0749388	± 2σint+J
Sample:	75-O-06		J-value:	0.0077864	6.1e-06	(2σ)
	40Ar	± 2σ40	39Ar	±2σ39	37Ar	± 2σ37	36Ar	± 2σ36							Included in
File	(cps)	(cps)	(cps)	(cps)	(cps)	(cps)	(cps)	(cps)	40Ar*/39ArK	± 2σ	%40Ar*	Age (Ma)	± 2σ (Ma)	K/Ca	wtd. mean
NAF5722	226745	137.945	35678	35.2244	217.788	1529.65	0.26266	1.7304	7.8085	0.0149296	99.9709	108.042	0.200595	57.8481	YES
NAF5725	288289	101.78	42781.6	36.2358	71.8685	1958.15	48.1013	2.27351	7.92405	0.0163362	95.8845	109.594	0.219309	211.546
NAF5727	368684	170.64	57599.9	51.0527	47.0984	1402.31	2.16851	1.51817	7.83429	0.008138	99.8488	108.389	0.109322	434.963
NAF5730	217239	78.9093	32783	31.6999	868.075	1139.66	20.4712	1.8934	7.92771	0.0174955	97.7107	109.643	0.234866	13.3455
NAF5732	285422	137.668	43387	41.6101	999.372	1263.56	34.733	2.08508	7.81599	0.014562	97.0233	108.143	0.195645	15.4014	YES
NAF5735	424093	144.982	66614.8	46.3652	738.377	1449.32	0.0223982	1.70151	7.81158	0.0078478	100.003	108.084	0.105441	32.0705	YES
NAF5737	474437	216.055	67597.7	59.5473	602.479	870.129	153.415	3.87185	7.93411	0.0171475	92.0282	109.729	0.230182	39.9097
NAF5740	358730	122.767	54685.4	44.8285	1353.42	1512.08	33.1986	2.05302	7.89094	0.0114535	97.7366	109.15	0.153797	14.367
NAF5742	260858	123.89	39740.5	40.2626	416.366	1330.63	32.0714	1.95499	7.83514	0.0149622	97.0039	108.4	0.200994	33.592
NAF5745	317035	127.997	50238.2	44.6822	192.587	1592.75	18.1663	1.86302	7.65635	0.0113941	98.5876	105.997	0.153263	92.5475
NAF5747	272410	133.496	42839.1	44.6048	874.675	1175.24	3.04947	1.80884	7.80384	0.0128212	99.7402	107.98	0.172273	17.2673	YES
NAF5750	267586	80.9831	42054.7	26.8808	1156.26	945.957	2.78491	1.28656	7.80556	0.00933207	99.767	108.003	0.125389	12.8015	YES
NAF5752	402129	177.783	62155.3	54.7101	787.24	1484.05	13.3764	1.61127	7.8913	0.00800308	99.1874	109.154	0.107465	28.0219
NAF5755	266382	110.963	41976.8	40.3143	81.374	1316.42	0.731913	1.44914	7.81107	0.0106459	99.9278	108.077	0.143036	181.951	YES
NAF5757	262155	135.328	40984.9	41.5975	25.2302	1104.19	5.14933	1.78944	7.84078	0.0132359	99.5134	108.476	0.177796	572.934
NAF5760	419969	179.385	65412.5	60.616	1096.33	1780.05	16.2887	1.96803	7.84718	0.00927637	99.0576	108.562	0.124603	21.1365
NAF5765	263324	89.3373	40615.1	36.3236	466.67	1390.94	15.4905	1.86354	7.89538	0.0140044	98.5669	109.209	0.188044	30.6833
NAF5767	378891	186.653	59827.8	61.5667	449.824	1122.67	1.81096	1.79535	7.81412	0.00910305	99.8837	108.118	0.122304	46.9791	YES
NAF5770	395883	144.587	62277	57.247	170.82	1581.06	6.53366	2.16467	7.83493	0.0106004	99.591	108.397	0.1424	129.002
NAF5772	313280	169.869	47883	46.4514	185.01	1288.51	33.2473	1.99855	7.88898	0.0126719	97.4073	109.123	0.170159	91.1056
NAF5775	441787	172.313	69536	47.3172	1237.25	2024	5.36058	1.90072	7.84938	0.00852693	99.7141	108.591	0.114534	19.8518
NAF5777	244327	138.914	37921.2	45.0083	1174.1	1500.21	17.9936	2.07001	7.84295	0.0166411	98.2311	108.505	0.223534	11.3429
NAF5782	386853	202.635	59582.2	69.1021	3490.67	1691.77	64.8944	2.76061	7.74268	0.0140479	95.9514	107.158	0.188839	6.01797
NAF5785	235274	104.567	37141.9	36.6129	310.958	1466.45	0.762151	1.76983	7.86923	0.0146157	99.9229	108.858	0.196291	41.8574
											weighted mean age (7 of 24):	108.066	0.052	± 2σint
												108.066	0.0993551	± 2σint+J
The values in this table have been corrected for instrument background, source mass bias, detector efficiency, and decay of 37Ar and 39Ar
Instrument:	Noblesse 5-collector mass spectrometer
Standard:	Fish Canyon sanidine
Standard age (Ma):	28.201	0.046	Kuiper et al. (2008)
Atmospheric argon ratios
40Ar/36Ar	298.56	0.31	Lee et al. (2006)
38Ar/36Ar	0.1885	0.0003	Lee et al. (2006)
Interfering isotope production ratios
(40Ar/39Ar)K	0.00054	0.00014	Jicha & Brown (2014)
(38Ar/39Ar)K	0.0121	2e-05	Jicha & Brown (2014)
(39Ar/37Ar)Ca	0.000695	9e-06	Renne et al. (2013)
(38Ar/37Ar)Ca	1.96e-05	8e-07	Renne et al. (2013)
(36Ar/37Ar)Ca	0.000265	2.2e-05	Renne et al. (2013)
Decay constants
l40Ar	(0.580 ± 0.014) x 10-10 a-1		Min et al. (2000)
lB-	(4.884 ± 0.099) x 10-10 a-1		Min et al. (2000)
39Ar	(2.58 ± 0.03) x 10-3 a-1
37Ar	(8.23 ± 0.042) x 10-4 h-1
36Cl	(2.303 ± 0.046) x 10-6 a-1

## Sheet: MAP data
Complete 40Ar/39Ar results using MAP 215-50 mass spectrometer
Single sanidine fusions
Sample:	WY-09-08			J-value:	0.0154389	6.17556e-06	(1σ)		D/amu:	1.00614	0.000402455	(1σ)
File	Laser Power	40Ar	40Ar	± 1σ40	39Ar	±1σ39	38Ar	± 1σ38	37Ar	± 1σ37	36Ar	± 1σ36	%40Ar*	40Ar*/39ArK	± 1σ	Age	± 2σ	K/Ca	Included in
	(%)	(moles)	(Volts)	(Volts)	(Volts)	(Volts)	(Volts)	(Volts)	(Volts)	(Volts)	(Volts)	(Volts)				(Ma)	(Ma)		wtd. mean
BI2659	40	6.11191e-15	1.03557	0.000721204	0.271121	0.000322832	0.00332462	6.81387e-05	0.00253699	0.000228333	0.000178954	1.00415e-05	94.7713	3.61988	0.01206	99.5445	0.64557	45.9525	YES
BI2661	40	7.0608e-15	1.19634	0.000798417	0.316894	0.000392443	0.00378233	5.14971e-05	0.0017612	0.00024695	0.000142673	9.97758e-06	96.3444	3.63722	0.0106398	100.008	0.569406	77.37	YES
BI2662	40	7.91392e-15	1.34089	0.000703847	0.356851	0.000322071	0.00441155	7.68413e-05	0.00228091	0.000255856	0.000146545	9.47194e-06	96.6401	3.63132	0.00872673	99.8506	0.467064	67.2738	YES
BI2664	40	7.95616e-15	1.34804	0.000667388	0.361263	0.00037728	0.00460506	8.18432e-05	0.00223383	0.000330719	0.000114332	1.01256e-05	97.362	3.63305	0.00929582	99.897	0.49751	69.541	YES
BI2665	40	7.40052e-15	1.2539	0.000701019	0.330583	0.000262553	0.00397167	3.76205e-05	0.0018466	0.000232645	0.000169934	1.01115e-05	95.8644	3.63615	0.00972287	99.9799	0.520342	76.9793	YES
BI2667	40	7.6418e-15	1.29478	0.000610431	0.349244	0.000321892	0.00418079	7.0277e-05	0.00224046	0.000277669	9.64222e-05	1.00225e-05	97.6673	3.62091	0.00927958	99.5721	0.496729	67.0283	YES
BI2668	40	7.40985e-15	1.25548	0.000661269	0.33345	0.000317823	0.00400651	5.71393e-05	0.00233188	0.00026398	0.000153198	9.9008e-06	96.2653	3.62453	0.00963614	99.6689	0.515788	61.4881	YES
BI2670	40	9.27847e-15	1.57209	0.000879582	0.420525	0.000387575	0.00501672	5.05756e-05	0.00405089	0.000332751	0.000163247	1.00928e-05	96.8072	3.61906	0.00811191	99.5225	0.434236	44.6382	YES
BI2671	40	6.36834e-15	1.07901	0.000619896	0.273586	0.000254334	0.00337069	4.84568e-05	0.00194341	0.00021437	0.000288069	1.00993e-05	91.9881	3.62799	0.0116406	99.7615	0.62305	60.5335	YES
BI2673	40	8.43766e-15	1.42963	0.000702784	0.384183	0.000304762	0.00443297	5.94467e-05	0.00258567	0.000218256	0.000112222	9.74281e-06	97.5495	3.63005	0.008234	99.8165	0.440701	63.8897	YES
BI2674	40	9.6149e-15	1.62909	0.000845976	0.439331	0.00035574	0.0053165	9.36901e-05	0.00298988	0.000228097	0.000129437	9.98364e-06	97.5209	3.61621	0.00757479	99.4463	0.4055	63.1835	YES
BI2676	40	7.22429e-15	1.22404	0.000629853	0.328555	0.000304177	0.00393673	4.63391e-05	0.00204889	0.000219529	0.00010892	9.74668e-06	97.2387	3.62267	0.00957975	99.6192	0.512784	68.9533	YES
BI2677	40	1.0291e-14	1.74365	0.000916941	0.471678	0.000347474	0.00555024	0.000102656	0.00281441	0.000188001	9.90883e-05	9.96386e-06	98.1873	3.62971	0.0070637	99.8074	0.378066	72.065	YES
BI2679	40	1.02427e-14	1.73546	0.000817451	0.457301	0.000387248	0.00558989	5.17703e-05	0.00256439	0.000240695	0.000264049	1.03638e-05	95.3733	3.61944	0.00757895	99.5327	0.405704	76.6804	YES
BI2680	40	1.10276e-14	1.86844	0.00081495	0.473075	0.00040513	0.00574856	7.06351e-05	0.00322292	0.000212267	0.000570398	1.18424e-05	90.8558	3.58843	0.00819338	98.7025	0.438794	63.1171
BI2987	40	8.21309e-15	1.39158	0.00167332	0.38224	0.000360056	0.00465364	5.48897e-05	0.00267927	0.000271575	3.74465e-06	8.02535e-06	99.7872	3.63286	0.00832886	99.8917	0.44576	61.3461	YES
BI2988	40	5.68485e-15	0.963207	0.00163841	0.263948	0.000293164	0.00328936	6.69859e-05	0.00174504	0.000228131	1.96881e-05	8.72296e-06	99.2622	3.62232	0.0122512	99.6098	0.655784	65.0397	YES
BI2990	40	8.52774e-15	1.44489	0.00176069	0.397591	0.00044083	0.00487901	0.000103573	0.00244064	0.000307698	1.35309e-05	7.84755e-06	99.5879	3.61915	0.00835074	99.5248	0.447021	70.0486	YES
BI2991	40	5.11028e-15	0.865856	0.00167568	0.235822	0.000255173	0.00278928	4.67199e-05	0.00305924	0.000274932	2.39938e-05	8.2525e-06	99.0617	3.63723	0.0131502	100.009	0.70375	33.1463	YES
BI2993	40	8.73033e-15	1.47922	0.00186027	0.398842	0.000365122	0.00489217	4.01456e-05	0.0058727	0.000364493	0.00012751	9.32225e-06	97.3382	3.6101	0.00896591	99.2826	0.480014	29.203	YES
BI2994	40	8.77942e-15	1.48753	0.0017798	0.406208	0.000374858	0.00500978	4.51459e-05	0.0027712	0.000263159	5.72702e-05	8.54865e-06	98.7294	3.61549	0.00830699	99.4269	0.444702	63.0299	YES
															weighted mean age (20 of 21):	99.67	0.13	± 2σint+J
Sample:	MT-09-06			J-value:	0.0154629	6.9583e-06	(1σ)		D/amu:	1.00659	0.000301977	(1σ)
File	Laser Power	40Ar	40Ar	± 1σ40	39Ar	±1σ39	38Ar	± 1σ38	37Ar	± 1σ37	36Ar	± 1σ36	%40Ar*	40Ar*/39ArK	± 1σ	Age	± 2σ	K/Ca	Included in
	(%)	(moles)	(Volts)	(Volts)	(Volts)	(Volts)	(Volts)	(Volts)	(Volts)	(Volts)	(Volts)	(Volts)				(Ma)	(Ma)		wtd. mean
BI3560	40	1.49667e-14	2.53586	0.00137286	0.700779	0.000509989	0.0084215	8.42928e-05	0.00569417	0.000438362	4.18495e-05	9.07776e-06	99.3807	3.59625	0.00503414	99.0615	0.269968	52.9196	YES
BI3562	40	1.50286e-14	2.54637	0.00242786	0.702152	0.000666793	0.00853822	7.83533e-05	0.0070127	0.000488394	5.78399e-05	9.91736e-06	99.2014	3.59758	0.00640713	99.0972	0.343591	43.0538	YES
BI3563	40	1.30665e-14	2.21391	0.000809162	0.613683	0.000376952	0.0076052	0.000101353	0.0224751	0.00101728	1.95391e-05	9.75559e-06	99.669	3.59573	0.00535738	99.0476	0.287305	11.7409	YES
BI3565	40	7.91631e-15	1.34129	0.000748481	0.371056	0.000297077	0.00446462	4.92479e-05	0.0027484	0.000341812	1.51701e-05	8.79515e-06	99.5324	3.59791	0.00783785	99.1061	0.420314	58.0532	YES
BI3566	40	1.01108e-14	1.71312	0.00104805	0.475453	0.000436621	0.00575144	5.50137e-05	0.00424709	0.000431692	1.97477e-06	9.08069e-06	99.8355	3.59722	0.00690141	99.0877	0.370099	48.1373	YES
BI3568	40	7.23155e-15	1.22527	0.000836373	0.339169	0.000262235	0.00411018	6.69761e-05	0.00293803	0.000442828	1.13616e-05	8.81412e-06	99.5953	3.59797	0.00853242	99.1076	0.45756	49.6392	YES
BI3569	40	9.16447e-15	1.55277	0.000816606	0.428305	0.000287982	0.00529121	0.000104227	0.00278418	0.000395195	3.44788e-05	9.48267e-06	99.2089	3.59673	0.00723131	99.0744	0.387794	66.1489	YES
BI3571	40	4.38273e-15	0.742584	0.000693537	0.203918	0.000197642	0.00247749	4.80159e-05	0.00133361	0.000356076	2.83542e-05	6.22124e-06	98.7375	3.59562	0.0102473	99.0448	0.549542	65.7497	YES
BI3574	40	8.16111e-15	1.38277	0.000813624	0.382692	0.000360258	0.00452917	8.84328e-05	0.0042467	0.000482152	9.85198e-06	6.1111e-06	99.6641	3.60116	0.00618786	99.1933	0.331815	38.7492	YES
BI3575	40	1.03968e-14	1.76157	0.00105459	0.487135	0.000366291	0.00600377	0.000101498	0.00433225	0.000375806	1.63901e-05	6.8646e-06	99.595	3.60156	0.00541891	99.2041	0.290579	48.3506	YES
BI3576	40	8.87456e-15	1.50365	0.00104175	0.415708	0.00036982	0.00505068	9.35876e-05	0.00373449	0.000423745	1.25609e-05	6.66422e-06	99.6233	3.60349	0.00624533	99.2557	0.334885	47.8655	YES
															weighted mean age (11 of 11):	99.1208	0.135751	± 2σint+J
The values in this table represent blank, discrimination, and decay (37Ar and 39Ar) corrected values
Instrument:	MAP215-50 mass spectrometer
Standard:	Fish Canyon sanidine
Standard age (Ma):	28.201	0.046	Kuiper et al. (2008)
Atmospheric argon ratios
40Ar/36Ar	298.56	0.31	Lee et al. (2006)
38Ar/36Ar	0.1885	0.0003	Lee et al. (2006)
Interfering isotope production ratios
(40Ar/39Ar)K	0.00054	0.00014	Jicha & Brown (2014)
(38Ar/39Ar)K	0.0121	2e-05	Jicha & Brown (2014)
(39Ar/37Ar)Ca	0.000695	9e-06	Renne et al. (2013)
(38Ar/37Ar)Ca	1.96e-05	8e-07	Renne et al. (2013)
(36Ar/37Ar)Ca	0.000265	2.2e-05	Renne et al. (2013)
Decay constants
l40Ar	(0.580 ± 0.014) x 10-10 a-1		Min et al. (2000)
lB-	(4.884 ± 0.099) x 10-10 a-1		Min et al. (2000)
39Ar	(2.58 ± 0.03) x 10-3 a-1
37Ar	(8.23 ± 0.042) x 10-4 h-1
36Cl	(2.303 ± 0.046) x 10-6 a-1
